# Supplementary material
Source: HighWire-hosted journal article supplement (https://bibliotheek.ehb.be/content/11/7/675)
Supplement: inline-supplementary-material-1 [file inline-supplementary-material-1.docx]

Supplement 1: Excluded Papers

1. Al Kasab S, Almadidy Z, Spiotta AM, et al. Endovascular treatment for AIS with underlying ICAD. J Neurointerv Surg. 2017;9(10):948-51.

2. Brekenfeld C, Schroth G, Mattle HP, et al. Stent placement in acute cerebral artery occlusion: use of a self-expandable intracranial stent for acute stroke treatment. Stroke 2009;40(3):847-52.

3. Dumont TM, Natarajan SK, Eller JL, et al. Primary stenting for acute ischemic stroke using the Enterprise vascular reconstruction device: early results. J Neurointerv Surg 2014;6(5):363-72.

4. Fitzsimmons B-FM, Becske T, Nelson PK. Rapid Stent-Supported Revascularization in Acute Ischemic Stroke. Am J Neuroradiol 2006;27(5):1132-4.

5. Heo YJ, Seo JH, Jeong HW. Emergent Intracranial Balloon Angioplasty and Bailout Self-Expandable Stent Placement in Acute Large Vessel Occlusion of the Anterior Circulation: Experience of a Single Institution. J Korean Soc Radiol 2017;76(6):403-10.

6. Jia B, Feng L, Liebeskind DS, et al. Mechanical thrombectomy and rescue therapy for intracranial large artery occlusion with underlying atherosclerosis. J Neurointerv Surg 2018; 10(8):746-750.

7. Lee HK, Kwak HS, Chung GH, et al. Balloon-expandable stent placement in patients with immediate reocclusion after initial successful thrombolysis of acute middle cerebral arterial obstruction. Interv Neuroradiol 2012;18(1):80-8.

8. Lee JS, Hong JM, Lee KS, et al. Primary stent retrieval for acute intracranial large artery occlusion due to atherosclerotic disease. J Stroke 2016;18(1):96-101.

9. Levy EI, Ecker RD, Horowitz MB, et al. Stent-assisted intracranial recanalization for acute stroke: early results. Neurosurgery 2006;58(3):458-63;

10. Levy EI, Mehta R, Gupta R, et al. Self-expanding stents for recanalization of acute cerebrovascular occlusions. AJNR Am J Neuroradiol 2007;28(5):816-22.

11. Levy EI, Rahman M, Khalessi AA, et al. Midterm clinical and angiographic follow-up for the first Food and Drug Administration-approved prospective, Single-Arm Trial of Primary Stenting for Stroke: SARIS (Stent-Assisted Recanalization for Acute Ischemic Stroke). Neurosurgery. 2011;69(4):915-20; discussion 20.

12. Levy EI, Siddiqui AH, Crumlish A, et al. First Food and Drug Administration-approved prospective trial of primary intracranial stenting for acute stroke: SARIS (stent-assisted recanalization in acute ischemic stroke). Stroke 2009;40(11):3552-6.

13. Linfante I, Samaniego EA, Geisbusch P, et al. Self-expandable stents in the treatment of acute ischemic stroke refractory to current thrombectomy devices. Stroke. 2011;42(9):2636-8.

14. Mocco J, Hanel RA, Sharma J, et al. Use of a vascular reconstruction device to salvage acute ischemic occlusions refractory to traditional endovascular recanalization methods. J Neurosurg 2010;112(3):557-62.

15. Seo JH, Jeong HW, Kim ST, et al. Adjuvant Tirofiban Injection Through Deployed Solitaire Stent As a Rescue Technique After failed Mechanical Thrombectomy in Acute Stroke. Neurointervention 2015;10(1):22-7.

16. Sung SM, Lee TH, Cho HJ, et al. Recanalization with Wingspan stent for acute middle cerebral artery occlusion in failure or contraindication to intravenous thrombolysis: a feasibility study. AJNR Am J Neuroradiol 2012;33(6):1156-61.

17. Woo HG, Sunwoo L, Jung C, et al. Feasibility of Permanent Stenting with Solitaire FR as a Rescue Treatment for the Reperfusion of Acute Intracranial Artery Occlusion. AJNR Am J Neuroradiol 2018;39(2):331-6.

18. Yang D, Lin M, Wang S, et al. Primary angioplasty and stenting may be superior to thrombectomy for acute atherosclerotic large-artery occlusion. Interv Neuroradiol 2018:1591019918763380.

19. Zaidat OO, Wolfe T, Hussain SI, et al. Interventional acute ischemic stroke therapy with intracranial self-expanding stent. Stroke 2008;39(8):2392-5.
